# Supplementary material
Source: publisher figshare collection journal article supplement (https://acs.figshare.com/ndownloader/files/3938347)
Supplement: Supplementary file 1 [file 3938347]

# Supporting Information

## **Interface Modification of ZnO-based Inverted PTB7:PC<sub>71</sub>BM Organic Solar Cells by Cesium Stearate and Simultaneous Enhancement of Device Parameters**

*Guojie Wang,<sup>†,‡</sup> Tonggang Jiu,<sup>\*†</sup> Jun Li,<sup>†</sup> Pandeng Li,<sup>†</sup> Xiaojin Song,<sup>‡</sup> Fushen Lu,<sup>‡</sup> and Junfeng Fang<sup>\*†</sup>*

<sup>†</sup> Institute of New Energy Technology, Ningbo Institute of Material Technology and Engineering (NIMTE), Chinese Academy of Science (CAS), Ningbo, Zhejiang, 315201, P. R. China. E-mail: jiutonggang@nimte.ac.cn; fangjf@nimte.ac.cn

<sup>‡</sup> Department of Chemistry, College of Science, Shantou University, Shantou, Guangdong, 515063, P. R. China.

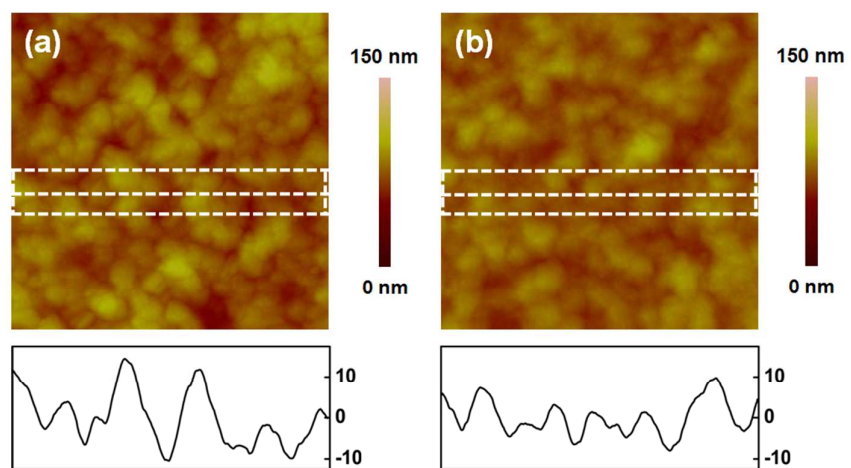

**Figure S1.** AFM height images and surface profiles of PTB7:PC<sub>71</sub>BM active layer on the (a) ZnO and (b) ZnO/CsSt interfacial layer with a scan size of 5 μm × 5 μm.

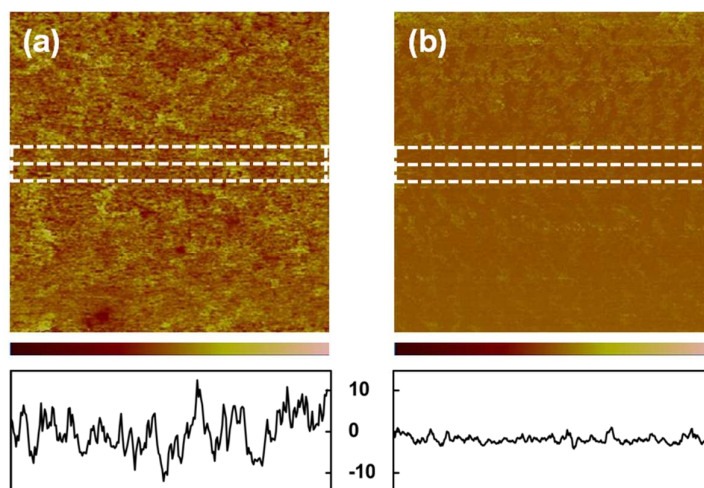

**Figure S2.** Conductive AFM images of (a) ZnO and (b) ZnO/CsSt interfacial layer with a scan size of  $5\ \mu\text{m} \times 5\ \mu\text{m}$ .

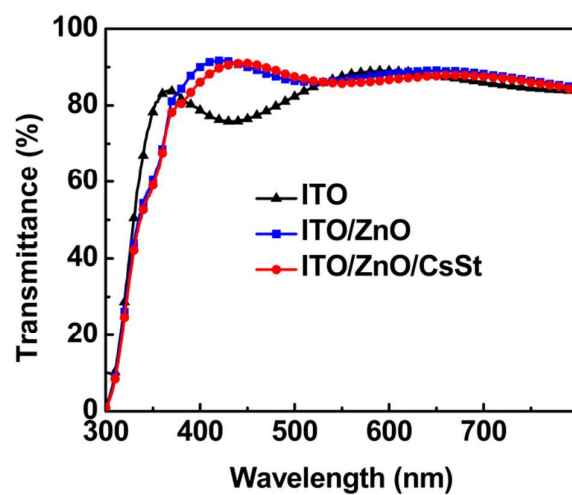

**Figure S3.** Transmission spectra of ZnO and ZnO/CsSt film on ITO glass substrates.

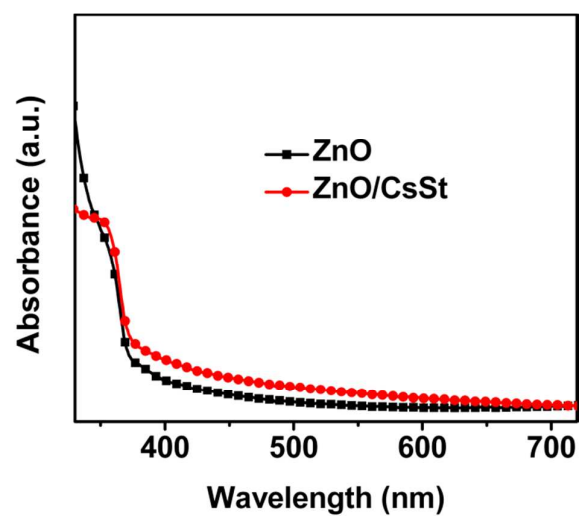

**Figure S4.** UV-vis absorption spectra of ZnO and ZnO/CsSt on quartz.

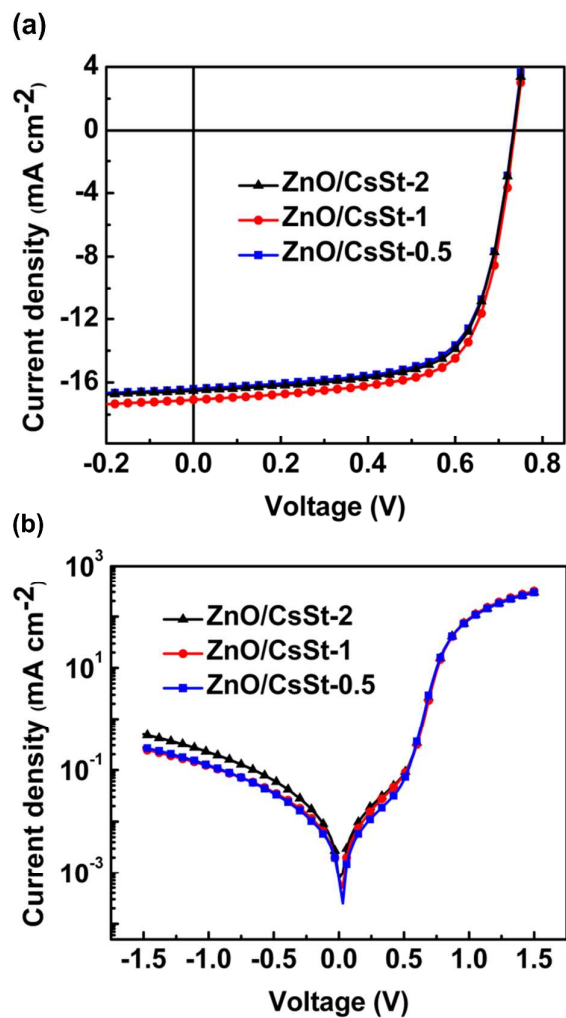

**Figure S5.** Current density-voltage ( $J-V$ ) characteristics of the devices with different concentration (0.5, 1 and 2 mg mL<sup>-1</sup>) of CsSt spin-coated on ZnO film as interfacial layer (a) under illumination, and (b) in the dark.

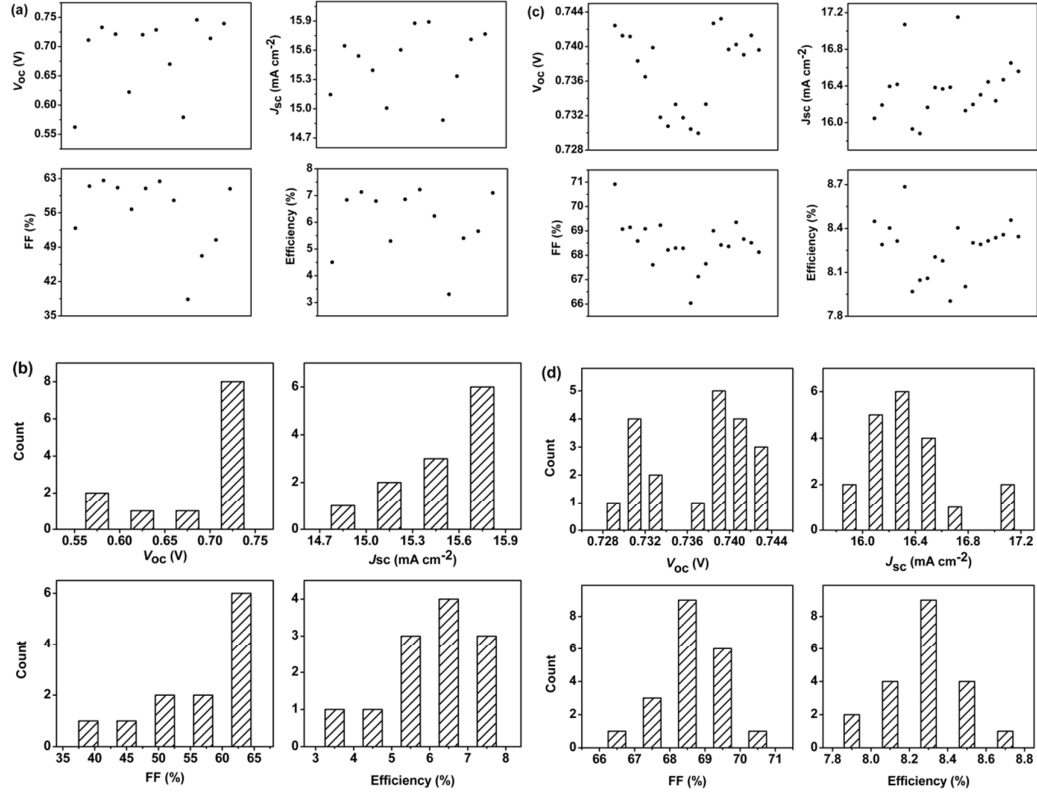

**Figure S6.** (a) Distribution of  $V_{oc}$ ,  $J_{sc}$ , FF and PCE of devices based on ZnO and (c) ZnO/CsSt as interfacial layer. (b) Statistical analysis of the devices parameters in part (a) and (d) in part (b).

**Table S1.** The energy level of ZnO and ZnO/CsSt on ITO substrates measured by UPS.

| sample       | HOMO level (eV) | LUMO level (eV) <sup>a</sup> |
|--------------|-----------------|------------------------------|
| ITO/ZnO      | 7.37            | 4.07                         |
| ITO/ZnO/CsSt | 7.17            | 3.87                         |

<sup>a</sup> LUMO level was determined by the relation: LUMO level=HOMO level-optical band gap. Optical band gap was determined from UV-vis absorption spectra (Figure S4).

**Table S2.**  $V_{oc}$ ,  $J_{sc}$ , FF and PCE of the devices with different concentration (from 0.5 to 2 mg mL<sup>-1</sup>) of CsSt spin-coated on ZnO film as interfacial layer.

| devices      | $V_{oc}$<br>(V) | $J_{sc}$<br>(mA cm <sup>-2</sup> ) | FF<br>(%) | PCE (%) |         |
|--------------|-----------------|------------------------------------|-----------|---------|---------|
|              |                 |                                    |           | best    | average |
| ZnO/CsSt-2   | 0.734           | 16.49                              | 68.9      | 8.34    | 8.25    |
| ZnO/CsSt-1   | 0.736           | 17.07                              | 69.1      | 8.69    | 8.46    |
| ZnO/CsSt-0.5 | 0.733           | 16.38                              | 68.3      | 8.21    | 8.13    |
